# Supplementary material for: Effects of Immunonutrition on Cancer Patients Undergoing Surgery: A Scoping Review
Source: MDPI journal article supplement (doi:10.3390/nu15071776), 2023-04-05
Supplement: s1 [file s1]

Author(s):  
Question: Immunonutrition compared to standard formula for head and neck cancer  
Setting:  
Bibliography:

| Certainty assessment                                 |                   |              |               |              |             |                      | Impact | Certainty                    | Importance |
|------------------------------------------------------|-------------------|--------------|---------------|--------------|-------------|----------------------|--------|------------------------------|------------|
| Ns of studies                                        | Study design      | Risk of bias | Inconsistency | Indirectness | Imprecision | Other considerations |        |                              |            |
| Dechaphunkul, 2022 mucositis prevention <sup>1</sup> |                   |              |               |              |             |                      |        |                              |            |
| 1                                                    | randomised trials | serious      | not serious   | serious      | not serious | none                 |        | <div>⊕⊕○○<br/>Low</div>      |            |
| Howes, 2018 <sup>2</sup>                             |                   |              |               |              |             |                      |        |                              |            |
| 16                                                   | randomised trials | serious      | not serious   | not serious  | not serious | none                 |        | <div>⊕⊕⊕○<br/>Moderate</div> |            |

CI: confidence interval

References

1.Dechaphunkul T, et al.. Benefits of immunonutrition in patients with head and neck cancer receiving chemoradiation: A phase II randomized, double-blind study. Clinical Nutrition 41 (2022) 433-440; 2022.  
2.Howes, . Immunonutrition for patients undergoing surgery for head and neck cancer. Cochrane Database Syst Rev. 2018 Aug 30;8(8):CD010954;
