# Supplementary material for: Effects of Immunonutrition on Cancer Patients Undergoing Surgery: A Scoping Review
Source: MDPI journal article supplement (doi:10.3390/nu15071776), 2023-04-05
Supplement: s1 [file s1]

**Author(s):**  
**Question:** Immunonutrition compared to standard formula in pancreatic surgery  
**Setting:**  
**Bibliography:** 1,2

| Certainty assessment                                                     |                   |                      |               |              |             |                      | N <sub>e</sub> of patients                       |                  | Effect                    |                                                    | Certainty        | Importance |
|--------------------------------------------------------------------------|-------------------|----------------------|---------------|--------------|-------------|----------------------|--------------------------------------------------|------------------|---------------------------|----------------------------------------------------|------------------|------------|
| N <sub>e</sub> of studies                                                | Study design      | Risk of bias         | Inconsistency | Indirectness | Imprecision | Other considerations | immunonutrition                                  | standard formula | Relative (95% CI)         | Absolute (95% CI)                                  |                  |            |
| Tagaki 2020, postsurgical complications (assessed with: riesgo relativo) |                   |                      |               |              |             |                      |                                                  |                  |                           |                                                    |                  |            |
| 5                                                                        | randomised trials | serious              | not serious   | not serious  | not serious | none                 | 46/107 (43.0%)                                   | 98/175 (56.0%)   | RR 0.74<br>(0.58 to 0.94) | 146 fewer per 1000<br>(from 235 fewer to 34 fewer) | ⊕⊕⊕⊕<br>Moderate | IMPORTANT  |
| Tagaki 2020, major complications (assessed with: RR)                     |                   |                      |               |              |             |                      |                                                  |                  |                           |                                                    |                  |            |
| 5                                                                        | randomised trials | serious <sup>a</sup> | not serious   | not serious  | not serious | none                 | 24/107 (22.4%)                                   | 49/175 (28.0%)   | RR 0.68<br>(0.41 to 1.12) | 90 fewer per 1000<br>(from 165 fewer to 34 more)   | ⊕⊕⊕⊕<br>Moderate | IMPORTANT  |
| Tagaki 2020, mortality (assessed with: RR)                               |                   |                      |               |              |             |                      |                                                  |                  |                           |                                                    |                  |            |
| 5                                                                        | randomised trials | serious <sup>a</sup> | not serious   | not serious  | not serious | none                 | 2/127 (1.6%)                                     | 5/185 (2.7%)     | RR 0.79<br>(0.16 to 3.99) | 6 fewer per 1000<br>(from 23 fewer to 81 more)     | ⊕⊕⊕⊕<br>Moderate | IMPORTANT  |
| Tagaki 2020, infectious complications (assessed with: RR)                |                   |                      |               |              |             |                      |                                                  |                  |                           |                                                    |                  |            |
| 5                                                                        | randomised trials | serious              | not serious   | not serious  | not serious | none                 | 31/144 (21.5%)                                   | 60/205 (29.3%)   | RR 0.60<br>(0.42 to 0.84) | 117 fewer per 1000<br>(from 170 fewer to 47 fewer) | ⊕⊕⊕⊕<br>Moderate | IMPORTANT  |
| Yang 2020, general complications (assessed with: RR)                     |                   |                      |               |              |             |                      |                                                  |                  |                           |                                                    |                  |            |
| 6                                                                        | randomised trials | not serious          | not serious   | not serious  | not serious | none                 | 35/104 (33.7%)                                   | 46/108 (42.6%)   | RR 0.79<br>(0.50 to 0.12) | 89 fewer per 1000<br>(from 375 fewer to 213 fewer) | ⊕⊕⊕⊕<br>High     | IMPORTANT  |
| Yang 2020, infectious complications                                      |                   |                      |               |              |             |                      |                                                  |                  |                           |                                                    |                  |            |
| 6                                                                        | randomised trials | not serious          | not serious   | not serious  | not serious | none                 | 16/129 (12.4%)                                   | 32/133 (24.1%)   | RR 0.50<br>(0.30 to 0.84) | 120 fewer per 1000<br>(from 168 fewer to 38 fewer) | ⊕⊕⊕⊕<br>High     | IMPORTANT  |
| Yang 2020 mortality (assessed with: RR)                                  |                   |                      |               |              |             |                      |                                                  |                  |                           |                                                    |                  |            |
| 6                                                                        | randomised trials | not serious          | not serious   | not serious  | not serious | none                 | 3/148 (2.0%)                                     | 2/149 (1.3%)     | RR 1.35<br>(0.27 to 6.88) | 5 more per 1000<br>(from 10 fewer to 79 more)      | ⊕⊕⊕⊕<br>High     | IMPORTANT  |
| Yang 2020 long of stay                                                   |                   |                      |               |              |             |                      |                                                  |                  |                           |                                                    |                  |            |
| 6                                                                        | randomised trials | not serious          | not serious   | not serious  | not serious | none                 | LOS MD = −2.03; 95% CI = −3.78, −0.45; p = 0.01) |                  |                           | ⊕⊕⊕⊕<br>High                                       | IMPORTANT        |            |
| Guan 2019 general complications (assessed with: RR) <sup>3</sup>         |                   |                      |               |              |             |                      |                                                  |                  |                           |                                                    |                  |            |
| 4                                                                        | randomised trials | serious              | not serious   | not serious  | not serious | none                 | 51/129 (39.5%)                                   | 65/133 (48.9%)   | RR 0.81<br>(0.62 to 1.05) | 93 fewer per 1000<br>(from 186 fewer to 24 more)   | ⊕⊕⊕⊕<br>Moderate | IMPORTANT  |
| Guan 2019, infectious complications                                      |                   |                      |               |              |             |                      |                                                  |                  |                           |                                                    |                  |            |

|   |                   |         |             |             |             |      |                |                |                                  |                                                           |                                                                                                 |           |
|---|-------------------|---------|-------------|-------------|-------------|------|----------------|----------------|----------------------------------|-----------------------------------------------------------|-------------------------------------------------------------------------------------------------|-----------|
| 4 | randomised trials | serious | not serious | not serious | not serious | none | 21/146 (14.4%) | 52/153 (34.0%) | <b>RR 0.58</b><br>(0.37 to 0.92) | <b>143 fewer per 1000</b><br>(from 214 fewer to 27 fewer) | <br>Moderate | IMPORTANT |
|---|-------------------|---------|-------------|-------------|-------------|------|----------------|----------------|----------------------------------|-----------------------------------------------------------|-------------------------------------------------------------------------------------------------|-----------|

Guan 2019, mortality

|   |                   |         |             |             |             |      |              |              |                                   |                                                       |                                                                                                 |           |
|---|-------------------|---------|-------------|-------------|-------------|------|--------------|--------------|-----------------------------------|-------------------------------------------------------|-------------------------------------------------------------------------------------------------|-----------|
| 4 | randomised trials | serious | not serious | not serious | not serious | none | 3/129 (2.3%) | 1/133 (0.8%) | <b>RR 2.43</b><br>(0.37 to 16.10) | <b>11 more per 1000</b><br>(from 5 fewer to 114 more) | <br>Moderate | IMPORTANT |
|---|-------------------|---------|-------------|-------------|-------------|------|--------------|--------------|-----------------------------------|-------------------------------------------------------|-------------------------------------------------------------------------------------------------|-----------|

CI: confidence interval; RR: risk ratio

Explanations

a. Risk of vias

References

1.Takagi, . . Langenbecks Arch Surg (2020) 405:585–593;  
2.Yang F, et al.. Immunonutrition in Patients with Pancreatic Cancer Undergoing Surgical Intervention: A Systematic Review and Meta-Analysis of Randomized Controlled Trials. Nutrients ; 2020, .  
3.Guan H, et al. Effects of Enteral Immunonutrition in Patients Undergoing Pancreaticoduodenectomy: A Meta-Analysis of Randomized Controlled Trials. Ann Nutr Metab 2019;74:53–61;
