# Supplementary material for: Effects of Immunonutrition on Cancer Patients Undergoing Surgery: A Scoping Review
Source: MDPI journal article supplement (doi:10.3390/nu15071776), 2023-04-05
Supplement: s1 [file s1]

**Author(s):**  
**Question:** Immunonutrition compared to standard nutrition for colorectal cancer surgery  
**Setting:**  
**Bibliography:**

| Certainty assessment                                                                                                                                |                   |                        |               |                      |             |                      | № of patients   |                    | Effect            |                   | Certainty        | Importance |
|-----------------------------------------------------------------------------------------------------------------------------------------------------|-------------------|------------------------|---------------|----------------------|-------------|----------------------|-----------------|--------------------|-------------------|-------------------|------------------|------------|
| № of studies                                                                                                                                        | Study design      | Risk of bias           | Inconsistency | Indirectness         | Imprecision | Other considerations | immunonutrition | standard nutrition | Relative (95% CI) | Absolute (95% CI) |                  |            |
| Lee SY et al. 2021. Complications, 30-day readmission, hospital length of stay and weight.                                                          |                   |                        |               |                      |             |                      |                 |                    |                   |                   |                  |            |
| 1                                                                                                                                                   | randomised trials | serious <sup>1a</sup>  | not serious   | not serious          | not serious | none                 | -/88            | -/88               | not estimable     |                   | ⊕⊕⊕○<br>Moderate |            |
| Moya P et al. 2016. Wound infection and length of stay.                                                                                             |                   |                        |               |                      |             |                      |                 |                    |                   |                   |                  |            |
| 1                                                                                                                                                   | randomised trials | serious <sup>2,b</sup> | not serious   | not serious          | not serious | none                 | -/61            | -/61               | not estimable     |                   | ⊕⊕⊕○<br>Moderate |            |
| Moya P et al. 2016. Complications and length of stay.                                                                                               |                   |                        |               |                      |             |                      |                 |                    |                   |                   |                  |            |
| 1                                                                                                                                                   | randomised trials | serious <sup>3,b</sup> | not serious   | not serious          | not serious | none                 | -/122           | -/122              | not estimable     |                   | ⊕⊕⊕○<br>Moderate |            |
| Wierdak M et al. 2021. Inflammatory response (TNF-α, CXCL8, CXCL1, superficial neutrophil infiltration), morbidity, length of stay or readmissions. |                   |                        |               |                      |             |                      |                 |                    |                   |                   |                  |            |
| 1                                                                                                                                                   | randomised trials | serious <sup>4,c</sup> | not serious   | not serious          | not serious | none                 | -/14            | -/12               | not estimable     |                   | ⊕⊕⊕○<br>Moderate |            |
| Xu J et al. 2017. Length of hospital stay, infections and inflammatory molecules.                                                                   |                   |                        |               |                      |             |                      |                 |                    |                   |                   |                  |            |
| 9                                                                                                                                                   | randomised trials | serious <sup>d</sup>   | not serious   | serious <sup>e</sup> | not serious | none                 | -/502           | -/502              | not estimable     |                   | ⊕⊕○○<br>Low      |            |

CI: confidence interval

**Explanations**

- a. Most of the included patients were non-obese, well-nourished patients. Small number of malnourished patients (8.5%). Adherence to nutritional supplements was not evaluated.
- b. Malnourished patients were excluded.
- c. Small number of patients included.
- d. Three studies did not give the sufficient information about randomization. Blinding of participants and personnel was conducted in four studies.
- e. More studies with specific timings (preoperative, perioperative, and postoperative) are needed for better understanding of immunonutrition in clinical practice.

**References**

1.Lee SY, Lee J,Park H-M,Kim CH,Kim HR. Impact of Preoperative Immunonutrition on the Outcomes of Colon Cancer Sur-gery: Results from a Randomized Controlled Trial. Ann Surg 2021. <https://doi.org/10.1097/SLA.0000000000005140..> .  
2.Moya P, Soriano-Irigaray L,Ramirez JM,Garcea A,Blasco O,Blanco FJ,et al. Perioperative Standard Oral Nutrition Sup-plements Versus Immunonutrition in Patients Undergoing Colorectal Resection in an Enhanced Recovery (ERAS) Protocol: A Multicenter Randomized Clinical Trial (SONVI Study). Medicine (Baltimore) 2016, <https://doi.org/10.1097/MD.0000000000003704..>, 95:e3704.. .  
3.Moya P, Miranda E,Soriano-Irigaray L,Arroyo A,Aguilar M-D-M,Bellón M,et al. Perioperative immunonutrition in nor-mo-nourished patients undergoing laparoscopic colorectal resection. Surg Endosc 2016, <https://doi.org/10.1007/s00464-016-4836-7..>, 30:4946-53.. .  
4.Wierdak M, Surmiak M,Milian-Ciesielska K,Rubinkiewicz M,Rzepa A,Wysocki M,et al. Immunonutrition Changes In-flammatory Response in Colorectal Cancer: Results from a Pilot Randomized Clinical Trial. Cancers 2021, <https://doi.org/10.3390/cancers13061444..>, 13:1444.. .
