# Supplementary material for: Effects of Immunonutrition on Cancer Patients Undergoing Surgery: A Scoping Review
Source: MDPI journal article supplement (doi:10.3390/nu15071776), 2023-04-05
Supplement: s1 [file s1]

Author(s):  
Question: Immunonutrition compared to standard formula in upper gastrointestinal surgery  
Setting:  
Bibliography: <sup>1</sup>

| Certainty assessment         |                   |                      |                      |              |                      |                      | Impact | Certainty                    | Importance |
|------------------------------|-------------------|----------------------|----------------------|--------------|----------------------|----------------------|--------|------------------------------|------------|
| Ns of studies                | Study design      | Risk of bias         | Inconsistency        | Indirectness | Imprecision          | Other considerations |        |                              |            |
|                              |                   |                      |                      |              |                      |                      |        |                              |            |
| Song, 2017 <sup>2</sup>      |                   |                      |                      |              |                      |                      |        |                              |            |
| 11                           | randomised trials | not serious          | not serious          | not serious  | serious <sup>a</sup> | none                 |        | <div>⊕⊕⊕⊖<br/>Moderate</div> |            |
| Zuho 2021 <sup>3</sup>       |                   |                      |                      |              |                      |                      |        |                              |            |
| 6                            | randomised trials | not serious          | not serious          | not serious  | not serious          | none                 |        | <div>⊕⊕⊕⊕<br/>High</div>     |            |
| Wong CS <sup>4</sup>         |                   |                      |                      |              |                      |                      |        |                              |            |
| 19                           | randomised trials | serious              | not serious          | not serious  | not serious          | none                 |        | <div>⊕⊕⊕⊖<br/>Moderate</div> |            |
| Adiamah 2021 <sup>5</sup>    |                   |                      |                      |              |                      |                      |        |                              |            |
| 1                            | randomised trials | not serious          | not serious          | not serious  | not serious          | none                 |        | <div>⊕⊕⊕⊕<br/>High</div>     |            |
| Cao 2022 <sup>6</sup>        |                   |                      |                      |              |                      |                      |        |                              |            |
| 15                           | randomised trials | serious              | serious <sup>b</sup> | not serious  | serious <sup>c</sup> | none                 |        | <div>⊕⊖⊖⊖<br/>Very low</div> |            |
| Cheng 2018 <sup>7</sup>      |                   |                      |                      |              |                      |                      |        |                              |            |
| 7                            | randomised trials | serious              | not serious          | not serious  | serious <sup>d</sup> | none                 |        | <div>⊕⊕⊖⊖<br/>Low</div>      |            |
| Li 2020 <sup>8</sup>         |                   |                      |                      |              |                      |                      |        |                              |            |
| 1                            | randomised trials | not serious          | not serious          | not serious  | not serious          | none                 |        | <div>⊕⊕⊕⊕<br/>High</div>     |            |
| Niu JW 2021 <sup>9</sup>     |                   |                      |                      |              |                      |                      |        |                              |            |
| 6                            | randomised trials | serious <sup>e</sup> | serious <sup>f</sup> | not serious  | not serious          | none                 |        | <div>⊕⊕⊖⊖<br/>Low</div>      |            |
| Li XK 2021 <sup>10</sup>     |                   |                      |                      |              |                      |                      |        |                              |            |
| 1                            | randomised trials | not serious          | serious <sup>g</sup> | not serious  | not serious          | none                 |        | <div>⊕⊕⊕⊖<br/>Moderate</div> |            |
| Kanekiyo, 2019 <sup>11</sup> |                   |                      |                      |              |                      |                      |        |                              |            |
| 1                            | randomised trials | not serious          | not serious          | not serious  | not serious          | none                 |        | <div>⊕⊕⊕⊕<br/>High</div>     |            |

CI: confidence interval

Explanations

- a. Regional data bases
- b. Observational studies
- c. lack time with IN
- d.
- e. Half of studies from same country
- f. no exclusion criteria
- g. laboratory values without clinical relevance

References

1.Yu J, et al.. Impact of perioperative enteral immunonutrition in patients with gastrointestinal cancer undergoing elective surgery: a randomized controlled trial.. Clinical Nutrition ESPEN; 2021.  
2.Song, . Systematic review with network meta-analysis: comparative efficacy of different enteral immunonutrition formulas in patients underwent gastrectomy. Oncotarget. ; 2017.  
3.Zhuo, G. Z et al. Is immunonutrition superior to standard enteral nutrition in reducing postoperative complications in patients undergoing esophagectomy? A meta-analysis of randomized controlled trials. BUON 2021; 26(1): 204-210; 2021.

- 4.Wong CS, Aly EH. The effects of enteral immunonutrition in upper gastrointestinal surgery: A systematic review and meta-analysis. *International Journal of Surgery* 29 (2016) 137e150; 2016.
- 5.A, Adiamah. Postoperative arginine-enriched immune modulating nutrition:Long-term survival results from a randomised clinical trial in patients with oesophagogastric and pancreaticobiliary cancer. *Clinical Nutrition* 40 (2021) 5482e5485; 2021.
- 6.Cao, . Effects of preoperative nutrition on postoperative outcomes in esophageal cancer:a systematic review and meta-analysis. *Diseases of the Esophagus* (2022)35,1–13; 2022.
- 7.Chen, . Enteral immunonutrition versus enteral nutrition for gastric cancer patients undergoing a total gastrectomy: a systematic review and meta-analysis. *BMC Gastroenterology* (2018) 18:11; 2018.
- 8.Ka Li, Yujie Xu,Yanjie Hu,Yuwei Liu,Xinrong Chen & Yong Zhou. Effect of Enteral Immunonutrition on Immune, Inflammatory Markers and Nutritional Status in Gastric Cancer Patients Undergoing Gastrectomy: A Randomized Double-Blinded Controlled Trial. *Journal of Investigative Surgery*. DOI: 10.1080/08941939.2019.1569736; 2019.
- 9... Niu JW, Zhou L, Liu ZZ, Pei DP, Fan WQ, Ning W. A Systematic Review and Meta-Analysis of the Effects of Perioperative Immunonutrition in Gastrointestinal Cancer Patients. *Nutr Cancer*. 2021;73(2):252-261; 2021.
- 10.Li XK, Cong ZZ,Wu W,Xu Y,Zhou H,Wang GM,Qiang Y,Luo LG,Shen Y. Enteral immunonutrition versus enteral nutrition for patients undergoing esophagectomy: a randomized controlled trial. *Ann Palliat Med*. 2021 Feb, 10(2):1351-1361, . .
- 11.Kanekiyo S, Takeda S, Jida M,Nishiyama M,Kitahara M,Shindo Y,Tokumitsu Y,Tomochika S,Tsunedomi R,Suzuki N,Abe T,Yoshino S,Hazama S,Ueno T,Nagano H. Efficacy of perioperative immunonutrition in esophageal cancer patients undergoing esophagectomy. *Nutrition*. 2019 Mar, 59:96-102., . .
