# Supplementary material for: Effects of Immunonutrition on Cancer Patients Undergoing Surgery: A Scoping Review
Source: Nutrients. 2023 Apr 5;15(7):1776. doi: 10.3390/nu15071776 (PMC10096769; doi:10.3390/nu15071776)
Supplement: Supplementary file 1 [file nutrients-15-01776-s001.zip]

Archive with 9 entries (9 files):
- S2 oncologic surgery.pdf
- S3 Head and Neck Cancer.pdf
- S4 Hepatectomy.pdf
- S5 Bladder.pdf
- S6 Colorectal.pdf
- S7 Esophagogastric.pdf
- S8 Pancreas.pdf
- Supplementary data S1.pdf
- Supplementary Data S9.pdf
